# Supplementary material
Source: PubMed Central journal article supplement (PMC1462967)
Supplement: 7601115s2.pdf [file 7601115s2.pdf]

## Supplementary Table I~IV

**Table I** Extended survival of *Brcal* mutant embryos by inactivation of *Chk2*

| Crosses          | <i>Brcal</i> <sup>+Δ</sup> <i>Chk2</i> <sup>+/-</sup> | x | <i>Brcal</i> <sup>+Δ</sup> <i>Chk2</i> <sup>+/-</sup>                                                       |
|------------------|-------------------------------------------------------|---|-------------------------------------------------------------------------------------------------------------|
| Total offspring  |                                                       |   | 221                                                                                                         |
| Genotypes        | <i>Brcal</i> <sup>ΔΔ</sup> <i>Chk2</i> <sup>+/+</sup> |   | <i>Brcal</i> <sup>ΔΔ</sup> <i>Chk2</i> <sup>+/-</sup> <i>Brcal</i> <sup>ΔΔ</sup> <i>Chk2</i> <sup>-/-</sup> |
| Predicted number | 14                                                    |   | 28      14                                                                                                  |
| Observed number  | 0                                                     |   | 9      15                                                                                                   |

**Table II** Extended survival of *Brcal* mutant embryos by inactivation of *Chk1*

| Crosses          | <i>Brcal</i> <sup>+Δ</sup> <i>Chk1</i> <sup>+/-</sup> | x | <i>Brcal</i> <sup>+Δ</sup> <i>Chk1</i> <sup>+/-</sup>                                                       |
|------------------|-------------------------------------------------------|---|-------------------------------------------------------------------------------------------------------------|
| Total offspring  |                                                       |   | 264                                                                                                         |
| Genotypes        | <i>Brcal</i> <sup>ΔΔ</sup> <i>Chk1</i> <sup>+/+</sup> |   | <i>Brcal</i> <sup>ΔΔ</sup> <i>Chk1</i> <sup>+/-</sup> <i>Brcal</i> <sup>ΔΔ</sup> <i>Chk1</i> <sup>-/-</sup> |
| Predicted number | 17                                                    |   | 33      17                                                                                                  |
| Observed number  | 2                                                     |   | 27 <sup>a</sup> 0                                                                                           |

a: Died 24 hrs after birth

**Table III** Aging and tumorigenesis of *Brcal*<sup>Δ/Δ</sup>*p53*<sup>+/-</sup> and *Brcal*<sup>Δ/Δ</sup>*Chk2*<sup>-/-</sup> mice

| Phenotypes                          | Mice                                                     |                                                        |
|-------------------------------------|----------------------------------------------------------|--------------------------------------------------------|
|                                     | <i>Brcal</i> <sup>Δ/Δ</sup> <i>p53</i> <sup>+/-</sup>    | <i>Brcal</i> <sup>Δ/Δ</sup> <i>Chk2</i> <sup>-/-</sup> |
| Aging-related changes: <sup>a</sup> |                                                          |                                                        |
| Decreasing of Skin thickness        | 75%                                                      | <10%                                                   |
| Decreasing of Bone density          | 70%                                                      | <10%                                                   |
| Intestinal villi atrophy            | 80%                                                      | <10%                                                   |
| Tumorigenesis:                      |                                                          |                                                        |
| Spectrum                            | Mammary, Thymus, Spleen, Lung, Liver, Brain, Soft tissue | Mammary, Ovarian, Liver, Thymus                        |
| Frequency                           | High in mammary and thymus                               | High in mammary and ovarian                            |
| Histology                           | Highly diverse histologic morphology                     | Less diverse                                           |
| Cytogenetic                         | Aneuploid (% high)                                       | Aneuploid (% Low)                                      |

a: Histological analysis was performed on 8 months old mice. At 18 months of age 47% males and 12.5% of females of *Brcal*<sup>Δ/Δ</sup>*Chk2*<sup>-/-</sup> mice exhibited premature aging.

**Table IV** Extended survival of *Brcal* mutant embryos by inactivation of ATM

| Crosses          | <i>Brcal</i> <sup>+Δ</sup> <i>Atm</i> <sup>+/-</sup> | x                                                    | <i>Brcal</i> <sup>+Δ</sup> <i>Atm</i> <sup>+/-</sup> |
|------------------|------------------------------------------------------|------------------------------------------------------|------------------------------------------------------|
| Total offspring  |                                                      | 180                                                  |                                                      |
| Genotypes        | <i>Brcal</i> <sup>ΔΔ</sup> <i>Atm</i> <sup>+/+</sup> | <i>Brcal</i> <sup>ΔΔ</sup> <i>Atm</i> <sup>+/-</sup> | <i>Brcal</i> <sup>ΔΔ</sup> <i>Atm</i> <sup>-/-</sup> |
| Predicted number | 11                                                   | 23                                                   | 11                                                   |
| Observed number  | 0                                                    | 17 (3) <sup>a</sup>                                  | 10                                                   |

a: Died 24 hrs after birth
